# Supplementary material for: Evolution of reduced co-activator dependence led to target expansion of a starvation response pathway
Source: eLife journal article supplement (doi:10.7554/elife.25157), 2017-05-09
Supplement: supp [file elife-25157-supp-v1.zip]

Archive with 12 entries (12 files):
- elife_poa_e25157_Figure_3_figure_Supplement_2.pdf
- elife_poa_e25157_Figure_3_source_data_1.zip
- elife_poa_e25157_Figure_5_source_data_2.xlsx
- elife_poa_e25157_Figure_6_source_data_3.xlsx
- elife_poa_e25157_Figure_6_source_data_1.xlsx
- elife_poa_e25157_Figure_6_source_data_2.xlsx
- elife_poa_e25157_Figure_6_source_data_4.xlsx
- elife_poa_e25157_Figure_4_figure_Supplement_1.pdf
- elife_poa_e25157_Figure_3_figure_Supplement_1.pdf
- elife_poa_e25157_Figure_5_source_data_1.xlsx
- elife_poa_e25157_Figure_4_source_data_1.xlsx
- elife_poa_e25157_Figure_5_figure_supplement_1.pdf
