# Supplementary material for: Evolution of reduced co-activator dependence led to target expansion of a starvation response pathway
Source: eLife journal article supplement (doi:10.7554/elife.25157), 2017-05-09
Supplement: supp [file elife-25157-supp-v1.zip › elife_poa_e25157_Figure_5_source_data_1.xlsx]

## Sheet: 20170108_figure5_source_data_1.
CHR	START	END	Consensus	CgPho4.enrichment.No.Pi.with.Pho2	CgPho4.enrichment.No.Pi.no.pho2	Ratio.Cgla4.no.Pi	CgPho4.enrichment.High.Pi.with.Pho2	CgPho4.enrichment.High.Pi.no.pho2	CgPho2.bound	CgPho2.enrichment.No.Pi	CgPho2.enrichment.High.Pi	CgPho4.gene.induced
Chr1	58151	58650	FALSE	6.148	4.51	1.36319	2.057	1.604	TRUE	4.531	2.034	TRUE
Chr1	128960	129844	TRUE	37.76	24.981	1.51155	2.465	2.146	TRUE	7.954	2.353	TRUE
Chr1	161432	161934	TRUE	18.907	17.003	1.11198	2.1	1.782	FALSE	2.051	1.344	TRUE
Chr1	162274	162773	FALSE	8.041	5.805	1.38519	0.968	0.913	TRUE	2.826	1.952	TRUE
Chr2	89413	89912	TRUE	5.332	3.261	1.63508	1.494	1.899	TRUE	2.343	1.442	FALSE
Chr2	235123	236105	TRUE	60.567	62.714	0.965765	1.964	2.054	TRUE	12.373	1.706	TRUE
Chr2	287490	287989	FALSE	13.548	7.261	1.86586	1.727	1.765	TRUE	4.603	3.33	TRUE
Chr2	294000	294500	FALSE	9.302	8.49	1.09564	1.026	1.011	TRUE	4.287	2.838	TRUE
Chr3	149148	149650	TRUE	5.426	4.341	1.24994	1.337	1.068	FALSE	0.923	1.025	FALSE
Chr3	151750	151950	FALSE	3.419	0.898	3.80735	1.56	1.29	TRUE	7.597	5.743	TRUE
Chr3	195405	195907	TRUE	5.18	4.078	1.27023	0.994	0.794	TRUE	1.705	1.133	TRUE
Chr3	235700	236000	FALSE	5.549	6.97	0.796126	0.942	1.32	TRUE	1.24	1.364	TRUE
Chr3	289467	289969	TRUE	11.153	5.487	2.03262	1.526	1.477	TRUE	7.012	4.753	FALSE
Chr3	447080	447582	TRUE	10.821	12.744	0.849105	1.905	1.749	TRUE	2.164	2.09	FALSE
Chr3	463680	464000	FALSE	7.097	2.026	3.50296	2.1	2.158	TRUE	4.454	4.301	TRUE
Chr4	140721	141223	TRUE	9.085	7.112	1.27742	1.097	1.231	TRUE	4.746	2.59	TRUE
Chr4	144155	144654	FALSE	4.181	2.831	1.47686	1.449	1.174	TRUE	3.888	2.699	FALSE
Chr4	427700	427900	TRUE	3.475	2.552	1.36168	2.839	2.49	FALSE	1.744	1.411	TRUE
Chr4	515381	515880	TRUE	5.317	3.275	1.62351	1.104	1.329	TRUE	6.523	2.455	TRUE
Chr4	521294	521793	FALSE	17.083	16.412	1.04088	1.013	0.872	TRUE	9.338	2.326	TRUE
Chr4	622101	622600	FALSE	8.83	2.92	3.02397	1.621	1.996	TRUE	6.404	4.379	TRUE
Chr5	106639	107138	FALSE	6.054	5.2	1.16423	2.548	2.878	TRUE	1.718	1.732	TRUE
Chr5	185511	186010	FALSE	11.809	5.655	2.08824	1.978	1.662	TRUE	5.796	3.117	TRUE
Chr5	341209	341711	TRUE	11.609	10.112	1.14804	1.424	1.378	FALSE	1.61	1.458	FALSE
Chr5	347487	347986	TRUE	3.515	4.881	0.720139	1.271	1.282	FALSE	1.317	1.098	FALSE
Chr5	437184	437683	FALSE	3.941	5.541	0.711243	0.635	0.684	TRUE	3.852	3.996	TRUE
Chr5	474500	475000	FALSE	6.878	3.388	2.03011	2.797	2.487	TRUE	8.525	3.509	TRUE
Chr5	549912	550675	TRUE	40.175	33.893	1.18535	1.85	2.122	TRUE	11.795	3.056	TRUE
Chr5	592307	592806	FALSE	6.687	6.955	0.961467	1.335	1.319	TRUE	2.605	2.054	TRUE
Chr5	631381	631983	TRUE	16.003	12.377	1.29296	0.66	0.831	TRUE	9.597	4.181	TRUE
Chr6	62500	62600	FALSE	3.519	1.084	3.24631	3.961	3.995	TRUE	3.065	3.21	TRUE
Chr6	68171	68787	TRUE	28.052	19.695	1.42432	1.334	1.59	TRUE	5.027	1.321	FALSE
Chr6	70615	71114	FALSE	6.332	3.452	1.8343	0.667	0.521	TRUE	8.408	3.528	TRUE
Chr6	213315	213514	FALSE	2.323	1.594	1.45734	0.953	0.985	FALSE	1.147	1.043	TRUE
Chr6	232730	233229	TRUE	45.271	31.894	1.41942	3.28	3.657	TRUE	9.311	1.786	TRUE
Chr6	802600	803000	FALSE	5.03	4.625	1.08757	0.761	0.929	TRUE	2.182	1.966	TRUE
Chr6	810158	810657	FALSE	5.633	5.546	1.01569	1.415	1.749	TRUE	8.002	3.37	FALSE
Chr7	30398	30897	TRUE	14.109	8.393	1.68104	1.898	2.16	TRUE	2.778	2.386	FALSE
Chr7	145563	146110	TRUE	20.69	16.566	1.24894	2.163	2.647	TRUE	5.01	2.504	TRUE
Chr7	456986	457492	FALSE	10.403	6.763	1.53822	1.597	1.304	TRUE	4.991	3.677	TRUE
Chr7	537558	538057	TRUE	10.805	6.529	1.65492	1.419	1.606	FALSE	2.039	1.409	FALSE
Chr7	580809	581397	TRUE	38.132	33.221	1.14783	1.462	1.736	TRUE	5.778	1.104	TRUE
Chr7	666000	666200	FALSE	3.471	3.212	1.08064	1.254	0.992	FALSE	1.132	1.073	TRUE
Chr7	762037	762539	TRUE	4.586	4.225	1.08544	2.116	1.936	TRUE	4.86	3.858	FALSE
Chr7	883903	884405	TRUE	4.021	4.041	0.995051	1.577	1.296	TRUE	1.598	1.636	FALSE
Chr8	70038	70969	FALSE	22.344	31.385	0.711932	0.987	0.888	TRUE	8.466	2.013	TRUE
Chr8	108207	108706	TRUE	18.858	14.764	1.2773	1.805	1.771	FALSE	1.508	1.221	TRUE
Chr8	522308	522807	FALSE	3.738	2.777	1.34606	0.833	0.896	TRUE	2.54	1.991	FALSE
Chr8	739734	740233	TRUE	2.897	3.992	0.725701	0.532	0.432	FALSE	0.942	1.105	FALSE
Chr8	852500	852800	TRUE	3.716	4.469	0.831506	0.686	0.684	FALSE	1.365	1.16	TRUE
Chr8	898500	899500	FALSE	7.027	7.644	0.919283	2.739	2.503	TRUE	3.888	1.81	TRUE
Chr8	979858	980357	TRUE	8.954	15.829	0.565671	1.885	1.769	FALSE	1.216	0.974	FALSE
Chr9	52890	53389	TRUE	28.472	34.467	0.826066	1.475	1.666	TRUE	4.546	1.461	TRUE
Chr9	72419	72921	TRUE	9.418	5.685	1.65664	1.217	1.427	TRUE	2.641	2.285	TRUE
Chr9	219853	220352	FALSE	8.032	4.701	1.70857	2.059	1.457	TRUE	3.976	2.744	FALSE
Chr9	538500	539000	FALSE	4.998	3.95	1.26532	0.615	0.749	TRUE	4.943	2.595	TRUE
Chr9	1067304	1067806	TRUE	5.765	3.348	1.72192	1.671	1.863	FALSE	1.807	1.945	TRUE
Chr10	395200	395400	FALSE	6.601	2.005	3.29227	1.877	1.362	TRUE	8.312	3.165	TRUE
Chr10	573282	573783	FALSE	15.583	12.64	1.23283	1.161	1.011	TRUE	2.91	2.313	TRUE
Chr10	676776	677275	TRUE	5.028	4.845	1.03777	0.84	0.668	TRUE	2.995	1.927	TRUE
Chr10	826200	826600	FALSE	8.621	2.626	3.28294	1.615	0.75	TRUE	5.873	4.825	TRUE
Chr11	78661	79160	TRUE	3.484	3.375	1.0323	1.441	1.416	TRUE	1.592	1.239	TRUE
Chr11	402501	404000	FALSE	6.671	3.922	1.70092	1.647	1.696	TRUE	2.242	2.278	TRUE
Chr11	496755	497254	TRUE	7.775	8.462	0.918814	3.432	3.586	FALSE	2.03	1.768	FALSE
Chr11	529611	530171	FALSE	35.687	24.714	1.444	3.257	2.955	TRUE	13.089	4.164	TRUE
Chr11	712427	712929	TRUE	4.622	3.872	1.1937	1.462	1.337	FALSE	1.199	1.162	FALSE
Chr11	739400	740200	FALSE	5.375	3.58	1.5014	0.97	0.981	TRUE	3.697	3.103	TRUE
Chr11	742617	743184	TRUE	13.758	10.387	1.32454	1	0.937	TRUE	1.52	1.123	TRUE
Chr11	743508	744007	TRUE	13.395	12.022	1.11421	1.75	1.638	TRUE	2.528	1.055	TRUE
Chr11	991800	993000	FALSE	6.143	1.946	3.15673	1.82	2.221	TRUE	10.042	7.341	TRUE
Chr11	1031304	1031803	FALSE	5.527	3.964	1.3943	1.416	1.251	TRUE	10.482	6.873	TRUE
Chr11	1166459	1166980	TRUE	31.261	28.598	1.09312	0.856	1.084	TRUE	5.229	2.281	TRUE
Chr12	95051	95948	TRUE	7.882	3.573	2.20599	1.481	1.377	TRUE	1.318	1.037	TRUE
Chr12	103000	104500	FALSE	4.097	4.46	0.91861	1.458	1.389	TRUE	6.213	3.893	FALSE
Chr12	277254	277753	TRUE	3.977	3.197	1.24398	0.705	0.702	TRUE	5.211	3.284	FALSE
Chr12	467561	468060	TRUE	3.31	3.424	0.966706	1.443	1.753	FALSE	1.025	1.19	FALSE
Chr12	601480	601979	TRUE	13.66	9.177	1.4885	1.761	2.014	TRUE	1.938	1.44	TRUE
Chr12	725805	726304	TRUE	10.429	11.015	0.9468	0.695	0.532	TRUE	6.11	2.354	TRUE
Chr12	749565	750067	TRUE	11.112	8.816	1.26044	2.506	3.316	TRUE	3.071	1.462	TRUE
Chr12	830176	830686	FALSE	9.512	11.076	0.858794	0.686	0.856	TRUE	5.05	2.314	TRUE
Chr12	929500	930000	FALSE	5.745	4.888	1.17533	0.712	0.646	TRUE	2.242	2.143	FALSE
Chr12	977500	978000	FALSE	5.296	3.509	1.50926	0.917	1.035	TRUE	2.981	2.271	TRUE
Chr12	1011275	1011839	TRUE	13.222	8.313	1.59052	0.833	0.888	TRUE	5.08	2.044	FALSE
Chr12	1012203	1012702	FALSE	7.118	2.609	2.72825	1.808	1.674	TRUE	4.102	3.261	FALSE
Chr12	1306404	1306906	TRUE	8.954	8.453	1.05927	1.545	2.044	FALSE	1.335	1.149	FALSE
Chr13	222521	223021	FALSE	8.094	4.953	1.63416	1.317	1.007	TRUE	5.021	2.845	TRUE
Chr13	226380	227223	TRUE	23.741	10.785	2.2013	1.231	1.638	TRUE	12.463	4.578	FALSE
Chr13	323916	324416	FALSE	22.411	17.006	1.31783	1.617	1.887	TRUE	2.039	1.365	TRUE
Chr13	660957	661456	TRUE	2.745	4.867	0.564002	1.327	1.361	FALSE	1.15	1.107	TRUE
Chr13	761517	762016	FALSE	3.579	7.233	0.494815	2.174	1.993	FALSE	1.372	1.203	FALSE
Chr13	763060	763559	FALSE	9.442	7.311	1.29148	1.443	1.216	TRUE	2.301	1.946	TRUE
Chr13	852605	853104	TRUE	21.672	27.789	0.779877	1.961	1.671	TRUE	4.138	1.664	TRUE
Chr13	853600	854099	FALSE	4.874	4.114	1.18474	0.986	0.855	TRUE	3.542	2.03	TRUE
Chr13	1081416	1081915	FALSE	3.353	3.414	0.982132	0.911	0.865	FALSE	1.042	1.221	TRUE
Chr13	1160948	1161916	TRUE	10.619	4.861	2.18453	1.834	2.417	TRUE	8.819	2.419	TRUE
Chr13	1240900	1241050	FALSE	2.753	3.58	0.768994	0.814	1.027	TRUE	3.071	1.57	TRUE
Chr13	1254930	1255130	FALSE	2.581	3.28	0.78689	1.195	1.625	FALSE	1	0.877	TRUE
Chr13	1297500	1298500	FALSE	3.848	2.479	1.55224	1.74	2.16	TRUE	6.69	4.507	TRUE
Chr13	1304835	1305334	TRUE	2.948	2.408	1.22425	2.666	2.399	FALSE	1.103	1.201	FALSE
Chr13	1310295	1310797	TRUE	14.703	9.261	1.58763	4.898	4.521	FALSE	3.13	2.042	FALSE
