# Supplementary material for: Evolution of reduced co-activator dependence led to target expansion of a starvation response pathway
Source: eLife journal article supplement (doi:10.7554/elife.25157), 2017-05-09
Supplement: supp [file elife-25157-supp-v1.zip › elife_poa_e25157_Figure_5_source_data_2.xlsx]

## Sheet: 20170108_figure5_source_data_2.
CHR	START	END	GeneID	Log2 fold CgPho4 alone	Log2 fold CgPho2 alone	Log2 fold CO	p-value CgPho4 alone	p-value CgPho2 alone	p-value CO
Chr1	58151	58650	CAGL0A00517g	0.252437	0.123541	0.368324	0.313336	0.615794	0.300027
Chr1	128960	129844	CAGL0A01243g	4.90299	-0.15152	0.768887	0.000178985	0.849259	0.565533
Chr1	161432	161934	CAGL0A01606g	1.32386	-0.416911	0.879006	0.00247635	0.310867	0.0847061
Chr1	161432	161934	CAGL0A01628g	1.00669	0.227888	-0.0670761	0.00647592	0.467455	0.877479
Chr1	162274	162773	CAGL0A01650g	1.80852	-0.215216	0.553768	1.62355e-05	0.441714	0.151572
Chr2	235123	236105	CAGL0B02453g	1.22854	0.0504138	0.322631	0.00173614	0.872665	0.462864
Chr2	235123	236105	CAGL0B02475g	10.5954	1.3463	-0.897703	1.48605e-11	0.0122138	0.115534
Chr2	287490	287989	CAGL0B02926g	6.35051	0.501263	1.65761	0.0011741	0.79016	0.409555
Chr2	294000	294500	CAGL0B02970g	1.6612	0.948379	-0.180371	3.53533e-05	0.00317244	0.625309
Chr3	151750	151950	CAGL0C01397g	0.405511	-0.759724	1.46138	0.385419	0.154135	0.035164
Chr3	195405	195907	CAGL0C01881g	0.258195	0.104614	0.103717	0.105997	0.492779	0.631115
Chr3	235700	236000	CAGL0C02321g	1.55187	-0.29292	0.840884	0.00293961	0.522535	0.169672
Chr3	463680	464000	CAGL0C04939g	0.510447	-0.12975	2.305	0.481458	0.860002	0.0228111
Chr4	140721	141223	CAGL0D01276g	0.993055	0.436233	-0.279995	0.0104232	0.206183	0.54638
Chr4	427700	427900	CAGL0D04378g	0.179905	-0.229028	1.05763	0.373548	0.260307	0.00267286
Chr4	521294	521793	CAGL0D05434g	1.26579	0.290907	-0.324016	0.000381184	0.266072	0.404094
Chr4	622101	622600	CAGL0D06512g	1.61541	1.24531	-0.448956	0.0207469	0.0640652	0.549952
Chr5	106639	107138	CAGL0E01177g	0.94644	0.102409	-0.220884	0.0246332	0.782625	0.682197
Chr5	185511	186010	CAGL0E01837g	0.745048	0.724069	0.115067	0.00850058	0.00960412	0.721971
Chr5	437184	437683	CAGL0E04548g	0.688959	0.0107239	0.264001	0.200518	0.983915	0.706237
Chr5	437184	437683	CAGL0E04554g	3.63268	1.44715	-2.18576	0.000146226	0.0703892	0.0203776
Chr5	474500	475000	CAGL0E04884g	1.31782	1.16356	-0.0948711	0.0106796	0.0206322	0.88004
Chr5	549912	550675	CAGL0E05566g	1.18987	0.251571	-0.163168	0.000796045	0.365598	0.664254
Chr5	549912	550675	CAGL0E05588g	0.657853	-0.229216	0.695231	0.010514	0.326251	0.0369927
Chr5	592307	592806	CAGL0E05940g	0.438222	0.192385	0.0793306	0.0323596	0.308556	0.76869
Chr5	631381	631983	CAGL0E06292g	5.46456	0.0768135	0.595706	0.00801005	0.972156	0.795191
Chr6	62500	62600	CAGL0F00605g	0.961883	-0.676385	1.59057	0.0938522	0.201495	0.0610407
Chr6	70615	71114	CAGL0F00649g	1.98055	1.94703	-0.936134	0.0464865	0.0475092	0.397557
Chr6	213315	213514	CAGL0F02145g	1.17262	-0.262957	0.616574	0.00029167	0.252351	0.0911511
Chr6	232730	233229	CAGL0F02387g	0.639712	0.0391909	0.713476	0.0435645	0.890336	0.113211
Chr6	802600	803000	CAGL0F08107g	0.360188	-0.115994	0.332282	0.2062	0.671725	0.411144
Chr7	145563	146110	CAGL0G01540g	2.36476	-0.366326	0.858905	2.03632e-05	0.266784	0.109945
Chr7	456986	457492	CAGL0G04829g	0.517978	-0.671294	1.27977	0.170394	0.1002	0.023002
Chr7	580809	581397	CAGL0G06050g	10.5714	-0.0333074	-0.0592158	2.29143e-10	0.962896	0.936435
Chr7	666000	666200	CAGL0G06952g	1.54149	-0.206256	0.55941	2.04616e-05	0.34723	0.11382
Chr8	70038	70969	CAGL0H00682g	0.0966014	-0.298751	0.992588	0.750279	0.335044	0.0343311
Chr8	70038	70969	CAGL0H00704g	0.112848	-0.880809	1.32518	0.821713	0.0926756	0.0841175
Chr8	108207	108706	CAGL0H01177g	0.93105	-0.130676	0.407211	0.0129996	0.68665	0.3832
Chr8	852500	852800	CAGL0H08778g	1.17195	0.375125	0.193943	7.5616e-05	0.0903141	0.476664
Chr8	898500	899500	CAGL0H09152g	0.649299	0.502847	-0.266437	0.019075	0.0573114	0.431156
Chr9	52890	53389	CAGL0I00748g	1.17595	0.665131	-0.17646	0.00208686	0.0459072	0.695558
Chr9	52890	53389	CAGL0I00726g	2.11109	1.61622	-0.58053	0.0226158	0.0714389	0.572221
Chr9	72419	72921	CAGL0I00902g	1.19392	0.277915	-0.334916	0.00177069	0.387943	0.410554
Chr9	538500	539000	CAGL0I05698g	-0.116666	-0.295349	0.758572	0.658318	0.272778	0.0587667
Chr9	1067304	1067806	CAGL0I10791g	2.77718	0.657446	-1.37535	6.11662e-06	0.106475	0.0133119
Chr10	395200	395400	CAGL0J04202g	0.86198	0.846448	2.8562	0.164447	0.171324	0.00603736
Chr10	573282	573783	CAGL0J06050g	1.26824	1.10536	-0.627871	0.00131436	0.00349915	0.188004
Chr10	676776	677275	CAGL0J07040g	0.234802	-0.433676	1.29037	0.643908	0.388852	0.100345
Chr10	826200	826600	CAGL0J08294g	0.154751	-0.366815	1.22538	0.518799	0.139228	0.00335946
Chr11	78661	79160	CAGL0K00693g	0.280363	-0.0732957	0.145759	0.110706	0.659691	0.535336
Chr11	78661	79160	CAGL0K00715g	0.0436779	-0.116686	0.658905	0.868776	0.659069	0.0916653
Chr11	402501	404000	CAGL0K04301g	2.27852	-0.521472	0.204042	0.000679062	0.401067	0.770935
Chr11	529611	530171	CAGL0K05390g	0.738631	-0.634695	0.607108	0.0437039	0.0669359	0.216109
Chr11	739400	740200	CAGL0K07458g	0.42215	0.186787	0.665849	0.079057	0.412087	0.0445288
Chr11	742617	743184	CAGL0K07480g	0.160907	-0.0853807	0.632893	0.57734	0.766206	0.148442
Chr11	742617	743184	CAGL0K07524g	1.02961	0.0127584	0.180701	0.0176787	0.972295	0.744324
Chr11	743508	744007	CAGL0K07546g	9.38748	0.825742	2.38505	4.34244e-09	0.284473	0.0111926
Chr11	991800	993000	CAGL0K10164g	3.91135	0.674129	0.204484	2.51505e-05	0.285587	0.79996
Chr11	1031304	1031803	CAGL0K10604g	0.800472	0.683237	0.435296	0.00632569	0.0150102	0.187916
Chr11	1166459	1166980	CAGL0K12034g	-0.0879904	-0.147014	0.787415	0.797536	0.671543	0.135598
Chr12	95051	95948	CAGL0L00759g	0.288683	-0.0252704	0.556487	0.314168	0.927981	0.190904
Chr12	601480	601979	CAGL0L05456g	1.75159	-0.204276	0.741489	1.22331e-06	0.277763	0.0220939
Chr12	725805	726304	CAGL0L06424g	0.937509	1.24955	-1.24291	0.0809749	0.0276775	0.107229
Chr12	749565	750067	CAGL0L06622g	1.14116	-0.120953	0.452914	0.000329533	0.594602	0.19105
Chr12	749565	750067	CAGL0L06644g	1.12337	0.181962	0.222802	0.00012145	0.385196	0.438762
Chr12	830176	830686	CAGL0L07502g	1.12466	0.997054	-0.67744	0.000157633	0.000443835	0.0449968
Chr12	977500	978000	CAGL0L08932g	-0.00822589	-0.101885	0.515953	0.971472	0.660077	0.136935
Chr13	222521	223021	CAGL0M01870g	1.23553	0.34404	-0.106721	0.02041	0.49258	0.861486
Chr13	226380	227223	CAGL0M01870g	1.23553	0.34404	-0.106721	0.02041	0.49258	0.861486
Chr13	323916	324416	CAGL0M02871g	0.868037	-0.181755	0.572614	0.000210483	0.274659	0.0346148
Chr13	660957	661456	CAGL0M06325g	1.74046	0.444751	-0.418671	0.000154687	0.214358	0.329074
Chr13	763060	763559	CAGL0M07634g	-0.109188	0.0979007	1.03576	0.859971	0.870087	0.207124
Chr13	852605	853104	CAGL0M08514g	0.826666	0.920622	-0.547683	0.0289327	0.0187071	0.290867
Chr13	853600	854099	CAGL0M08552g	0.28191	-0.212067	0.168896	0.214032	0.337486	0.595116
Chr13	1081416	1081915	CAGL0M10829g	0.561388	0.0365509	0.174142	0.0431102	0.884171	0.630482
Chr13	1160948	1161916	CAGL0M11660g	4.50006	0.967876	0.39744	3.31554e-07	0.0410969	0.519909
Chr13	1240900	1241050	CAGL0M12430g	0.478964	0.0534144	0.109788	0.0892073	0.839332	0.772693
Chr13	1240900	1241050	CAGL0M12474g	0.473665	-0.412519	1.46481	0.284291	0.374824	0.021829
Chr13	1254930	1255130	CAGL0M12705g	1.05296	-0.591347	0.851091	0.000158334	0.00945633	0.00953304
Chr13	1297500	1298500	CAGL0M13189g	1.83376	0.875189	0.0855592	0.00139881	0.0795411	0.882146
