# Supplementary material for: Evolution of reduced co-activator dependence led to target expansion of a starvation response pathway
Source: eLife journal article supplement (doi:10.7554/elife.25157), 2017-05-09
Supplement: supp [file elife-25157-supp-v1.zip › elife_poa_e25157_Figure_6_source_data_1.xlsx]

## Sheet: Table S1 - GO_enrich
Figure 6- source data 1- Gene Ontology (GO) terms enrichment analysis results
Terms with P < 0.1 are shown
GOID	GO_term	Cluster frequency	Background frequency	Corrected P-value	False discovery rate	Gene(s) annotated to the term	Directly Annotated GOID List
6797	polyphosphate metabolic process	4 out of 79 genes, 5.1%	10 out of 5293 background genes, 0.2%	0.00414	0	PHO84:PHM1:PHO87:PHM4	2000185:16237:2000769:7034:7264:6817:6828:8104:6814:1904728:42144:6799:97080:6797
6793	phosphorus metabolic process	20 out of 79 genes, 25.3%	523 out of 5293 background genes, 9.9%	0.02532	0.01	PHO84:CAGL0C01397g:CAGL0D04378g:CAGL0F00649g:PHM1:PHO87:LSC2:CAGL0H01177g:CAGL0H09152g:CAGL0I00748g:CAGL0I05698g:CAGL0J07040g:CAGL0K00693g:CAGL0K04301g:CAGL0K07458g:PGM1:CAGL0K10604g:PHO81:SSK2:PHM4	16237:90154:36178:42144:161:2000769:6002:6650:6116:5978:71216:6629:6468:902:7034:46777:34605:18105:97080:8361:15846:31505:32958:10922:6814:19255:6011:86:6715:1900432:7231:36168:1903936:36180:6003:6071:32874:6000:320:40020:51403:6817:6828:19655:90157:749:19388:1904728:44879:34599:70941:6644:9267:6104:61093:7264:8104:10697:5992:79:6799:6796:6797:46475:2000185:10919:6874:36170:9405:35690
6817	phosphate ion transport	3 out of 79 genes, 3.8%	6 out of 5293 background genes, 0.1%	0.02845	0.0067	CAGL0B02453g:PHO84:PHO87	1903778:6348:97080:6814:6360:6383:1904263:6828:6817:1904728:6797:2000185:10507
15698	inorganic anion transport	4 out of 79 genes, 5.1%	16 out of 5293 background genes, 0.3%	0.03351	0.005	CAGL0B02453g:PHO84:PHO87:CAGL0J08294g	1903778:6348:97080:6814:46713:6623:6360:6383:1904263:6828:6817:1904728:6797:2000185:10507
6874	cellular calcium ion homeostasis	4 out of 79 genes, 5.1%	17 out of 5293 background genes, 0.3%	0.04333	0.004	CAGL0A00517g:CAGL0E05940g:PGM1:ENA1	30448:33157:61454:55085:9268:9272:5978:55078:42149:6816:90002:31505:71433:6814:19255:70588:6011:6972:15886:32995:19388:17157:97623:51208:5992:9651:6874:6883:35690
