# Supplementary material for: Evolution of reduced co-activator dependence led to target expansion of a starvation response pathway
Source: eLife journal article supplement (doi:10.7554/elife.25157), 2017-05-09
Supplement: supp [file elife-25157-supp-v1.zip › elife_poa_e25157_Figure_6_source_data_2.xlsx]

## Sheet: Table S2
Figure 6- source data 2- Comparing Pho4 targets with phosphate homeostasis related functions in S. cerevisiae and C. glabrata
Quality	ORF	Gene Name	S. cerevisiaeortholog	Motif	ChIP	Fold w/ Pho2	Fold w/o Pho2	P-value	Function
Conserved withS. cerevisiae
3	CAGL0B02475g	PHO84	PHO84	2	1	>100	>100	< 0.01	High affinity Pi transporter
3	CAGL0A01243g	GIT1	GIT1	2	1	50.9805	29.919	< 0.01	Plasma membrane permease; substrates as sources of inositol and phosphate
3	CAGL0M11660g	NA	GPP2 (=HOR2)	2	1	29.8054	22.6284	< 0.01	Glycerol-3-Phosphate Phosphatase
3	CAGL0L05456g	PHO86	PHO86	2	1	5.63	3.3673	< 0.01	ER membrane localized, required for Pho84 exit
3	CAGL0C02321g	PHM8	PHM8	1	1	5.25	2.93198	< 0.01	Lysophosphatidic acid phosphatase, nucleotidase; response to phosphate starvation
2	CAGL0G06952g	PHM3	VTC4	1	1	4.29	2.91094	< 0.01	polyphosphate synthesis, subunit of the vacuolar transporter chaperone complex
3	CAGL0L06622g	PHO81	PHO81	2	1	3.02	2.20559	< 0.01	Negative regulatory of CDK, lead to Pho4 translocation into the nucleus
2	CAGL0M12705g	PHM4	VTC1	1	1	3.74	2.07479	< 0.01	polyphosphate synthesis, subunit of the vacuolar transporter chaperone complex
2	CAGL0F02145g	PHM1 (=PHM2)	VTC2, VTC3	1	1	3.46	2.25421	< 0.01	polyphosphate synthesis, subunit of the vacuolar transporter chaperone complex
3	CAGL0J07040g	NA	GDE1	2	1	2.88	1.17675	0.02	Phosphodiesterase; product serves as a phosphate source
2	CAGL0K12034g	ENA1	ENA1	2	1	1.62	0.940832	0.12	P-type ATPase sodium pump; Na+ / Li+ efflux, salt tolerance
Only inC. glabrata
3	CAGL0K07524g	PMU1	no ortholog	2	1	2.31387	2.04147	0.014	putative phosphomutase
3	CAGL0K07546g	PMU2	no ortholog	2	1	>100	>100	< 0.01	phosphate starvation inducible acid phosphatase
3	CAGL0F02387g	PHO87	PHO87	2	1	2.55476	1.55802	< 0.01	Low affinity Pi transporter
2	CAGL0M12430g	RHR2	GPP1 (=RHR2)	1	1	1.50395	1.39374	0.11	Glycerol-3-Phosphate Phosphatase
Only inS. cerevisiae						3.6
	CAGL0M09823g	VIP1	VIP1	1	-1	1.58	1.75539	0.03	IP6 and IP7 kinase; important for phosphate signaling
	CAGL0K04939g	NA	YNL217W	1	0	1.47	1.22232	0.06	Putative phosphatase
	CAGL0H07359g	PHO8	PHO8	0	0	1.2781	1.06222	0.36	Repressible vacuolar alkaline phosphatase
	CAGL0L04422g	NA	DDP1	1	0	1.08	0.643631	0.81	Polyphosphate phosphatase
	CAGL0F02035g	CTF19	CTF19	1	0	1.06	1.58598	0.88	microbule spindle related
	CAGL0H01815g	CBF1	CBF1	2	0	1.02	1.11118	0.95	Centralmere binding factor
	no ortholog		SPL2						Regulatory protein
	no ortholog		PHO5						Repressible acid phosphatase
	no ortholog		PHO11						Repressible acid phosphatase
	no ortholog		PHO12						Repressible acid phosphatase
	no ortholog		PHO89						Plasma membrane Na+/Pi cotransporter
	no ortholog		PHM6						unknown
	no ortholog		YAR070C						Dubious ORF
	no ortholog		YJL119C						Dubious ORF
	no ortholog		YJL012C-A						merged withVTC4in new genome annotation
	3 paralogs		ENA2						paralog of ScENA1, whose ortholog in C. glabrata, i.e. CAGL0K12034g, is induced by CgPho4
