# Supplementary material for: Evolution of reduced co-activator dependence led to target expansion of a starvation response pathway
Source: eLife journal article supplement (doi:10.7554/elife.25157), 2017-05-09
Supplement: supp [file elife-25157-supp-v1.zip › elife_poa_e25157_Figure_6_source_data_3.xlsx]

## Sheet: Table S3 - GO_map
Figure 6- source data 3- All 79 CgPho4 target genes mapped to GO Slim terms
Legend: genes used for generating Table S4-7 were manually curated from this table to remove spurious and add confident associations
Yellow highlights refer to the GO terms detailed in Figure 6- source data 4
GOID	GO term	Frequency	Gene(s)	Organism
50789	regulation of biological process	28 out of 79 genes, 35.4%	CAGL0F00649g MIG1 LSP1 MSN4 CAGL0M07634g CAGL0E05940g CPR1 HSP12 CAGL0E06292g CAGL0M06325g SSK2 CAGL0E04884g CAGL0E05566g PHO84 CAGL0D01276g NCE103 GLK1 PHO81 CAGL0D04378g CAGL0K00693g CAGL0I00902g CAGL0D06512g CAGL0D05434g PHM4 PHO86 CAGL0B02453g CAGL0K07458g PHO87	Candida glabrata
6950	response to stress	20 out of 79 genes, 25.3%	CAGL0F00649g LSP1 CAGL0K10604g MSN4 CAGL0M07634g HSP12 CAGL0M06325g RHR2 CAGL0E05588g SSK2 CAGL0E04884g CAGL0E05566g CAGL0D01276g NCE103 PHO81 CAGL0D06512g CAGL0D05434g RTA1 CAGL0L07502g ENA1	Candida glabrata
42221	response to chemical	19 out of 79 genes, 24.1%	CAGL0F00649g MIG1 CAGL0K10604g MSN4 CAGL0M07634g HSP12 CAGL0M06325g SSK2 CAGL0E04884g CAGL0A00517g CAGL0E05566g CAGL0J07040g CAGL0D01276g NCE103 CAGL0K00693g CAGL0L06424g CAGL0D06512g CAGL0M08552g CAGL0K07458g	Candida glabrata
6810	transport	16 out of 79 genes, 20.3%	LSP1 CAGL0E05940g CAGL0E06292g GIT1 CAGL0H00704g CAGL0A00517g PHO84 CAGL0H09152g PHM1 PHM4 PHO86 CAGL0M08552g CAGL0B02453g CAGL0J08294g PHO87 ENA1	Candida glabrata
8150	biological_process unknown	15 out of 79 genes, 19%	BMT3 PMU2 CAGL0G06050g BMT5 CAGL0G04829g CAGL0E04548g PMU1 CAGL0E04554g CAGL0I00726g CAGL0M01870g CAGL0M12474g PHM3 CAGL0L06644g CAGL0M11660g CAGL0A01650g	Candida glabrata
6464	cellular protein modification process	9 out of 79 genes, 11.4%	CAGL0F00649g CAGL0K10604g CPR1 SSK2 CAGL0K00693g CAGL0H09152g CAGL0K04301g CAGL0M02871g CAGL0K07458g	Candida glabrata
71555	cell wall organization	8 out of 79 genes, 10.1%	CAGL0F00649g CAGL0K10604g CAGL0J06050g CAGL0E05940g CAGL0M06325g CAGL0L06424g PIR5 CAGL0L07502g	Candida glabrata
5975	carbohydrate metabolic process	7 out of 79 genes, 8.9%	CAGL0I00748g RHR2 CAGL0J07040g CAGL0C01397g GLK1 PGM1 CAGL0H00682g	Candida glabrata
42493	response to drug	7 out of 79 genes, 8.9%	MIG1 CAGL0M07634g CAGL0M06325g CAGL0A00517g CAGL0J07040g CAGL0K00693g CAGL0M08552g	Candida glabrata
30447	filamentous growth	7 out of 79 genes, 8.9%	CAGL0F00649g CAGL0M07634g CAGL0E04884g CAGL0E05566g PHO81 CAGL0D06512g ENA1	Candida glabrata
7165	signal transduction	7 out of 79 genes, 8.9%	CAGL0F00649g CAGL0E06292g CAGL0M06325g SSK2 CAGL0D01276g CAGL0D06512g PHM4	Candida glabrata
7049	cell cycle	6 out of 79 genes, 7.6%	CAGL0J06050g CPR1 CAGL0D01276g GLK1 CAGL0K00693g CAGL0A01606g	Candida glabrata
6629	lipid metabolic process	5 out of 79 genes, 6.3%	CAGL0C04939g CAGL0J07040g PHO81 CAGL0H01177g CAGL0K07458g	Candida glabrata
6996	organelle organization	5 out of 79 genes, 6.3%	CAGL0E04884g CAGL0H00704g PHM1 PHM4 CAGL0A01606g	Candida glabrata
19725	cellular homeostasis	5 out of 79 genes, 6.3%	CAGL0E05940g CAGL0A00517g PGM1 CAGL0D06512g ENA1	Candida glabrata
9405	pathogenesis	5 out of 79 genes, 6.3%	CAGL0F00649g CAGL0M07634g RHR2 CAGL0E05566g CAGL0K00693g	Candida glabrata
48468	cell development	4 out of 79 genes, 5.1%	CAGL0J06050g CAGL0M07634g CPR1 GLK1	Candida glabrata
7155	cell adhesion	4 out of 79 genes, 5.1%	CAGL0M07634g HSP12 RHR2 CAGL0L06424g	Candida glabrata
16070	RNA metabolic process	3 out of 79 genes, 3.8%	CAGL0E05566g CAGL0B02453g CAGL0H08778g	Candida glabrata
746	conjugation	3 out of 79 genes, 3.8%	CAGL0D01276g CAGL0L06424g CAGL0K07458g	Candida glabrata
42710	biofilm formation	3 out of 79 genes, 3.8%	CAGL0M07634g RHR2 CAGL0E05566g	Candida glabrata
6457	protein folding	2 out of 79 genes, 2.5%	CPR1 PHO86	Candida glabrata
30448	hyphal growth	2 out of 79 genes, 2.5%	CAGL0M07634g ENA1	Candida glabrata
6091	generation of precursor metabolites and energy	2 out of 79 genes, 2.5%	CAGL0I00748g PGM1	Candida glabrata
44419	interspecies interaction between organisms	2 out of 79 genes, 2.5%	CAGL0M07634g RHR2	Candida glabrata
6259	DNA metabolic process	2 out of 79 genes, 2.5%	CAGL0E05588g CAGL0A01606g	Candida glabrata
16192	vesicle-mediated transport	2 out of 79 genes, 2.5%	LSP1 PHO86	Candida glabrata
7124	pseudohyphal growth	1 out of 79 genes, 1.3%	CAGL0M07634g	Candida glabrata
7114	cell budding	1 out of 79 genes, 1.3%	CAGL0C01881g	Candida glabrata
70783	growth of unicellular organism as a thread of attached cells	1 out of 79 genes, 1.3%	CAGL0M07634g	Candida glabrata
42254	ribosome biogenesis	0 out of 79 genes, 0%	none
910	cytokinesis	0 out of 79 genes, 0%	none
7010	cytoskeleton organization	0 out of 79 genes, 0%	none
30163	protein catabolic process	0 out of 79 genes, 0%	none
45333	cellular respiration	0 out of 79 genes, 0%	none
32196	transposition	0 out of 79 genes, 0%	none
6766	vitamin metabolic process	0 out of 79 genes, 0%	none
6412	translation	0 out of 79 genes, 0%	none
6997	nucleus organization	0 out of 79 genes, 0%	none
other	other	8 out of 79 genes, 10.1%	PHM8 YPS9 LSC2 CAGL0I10791g CAGL0K10164g HIS1 CAGL0I05698g CAGL0K05390g	Candida glabrata
