# Supplementary material for: Evolution of reduced co-activator dependence led to target expansion of a starvation response pathway
Source: eLife journal article supplement (doi:10.7554/elife.25157), 2017-05-09
Supplement: supp [file elife-25157-supp-v1.zip › elife_poa_e25157_Figure_6_source_data_4.xlsx]

## Sheet: Legend
Common legends for Table S1-5
Gene Name (Table S2): common names in C. glabrata, if it exists. S. cerevisiae ortholog: refer to the common names of the ortholog of the C. glabrata gene in S. cerevisiae, if it exists.
Gene Name (Table S3-7): names in parenthesis refer toS. cerevisiaeorthologs; names in curly bracket refer to “best hit” inS. cerevisiae; the rest refer to names inC. glabrata; One exception is CAGL0M07634g, where the Gene Name (EFG1)* refers to the ortholog inC. albicans.
Motif: 2 = “CACGTG”; 1 = one bp mismatch; 0 = more than one bp mismatches
ChIP: 1 = confident binding events; 0.5 = weak binding events; 0 = no binding; -1 = uncertain
Quality: arbitrary score for confidence on the gene being Pho4 target. 3 = high; 2 = medium; 1 = relatively low; -1 = uncertain
Table S1 Stress and starvation response
Table S2 Response to chemical
Table S3 Cell wall and adhesion
The last three genes in the table were not associated with the GO terms “Cell wall synthesis” and “Cell adhesion”. They were included here because their functional annotation bears relationship to cell wall synthesis or cell adhesion
Table S4 Carbon metabolism
Table S5 All other functional categories

## Sheet: Table S1
Table S1 Stress and starvation response
Quality	Stressor(s)	ORF	Gene Name	Motif	ChIP	Fold w/ Pho2	Fold w/o Pho2	P-value	Function	Process	Other annotation
3	DNA damage	CAGL0E05588g	(REV1)	2	1	2.55458	1.57773	< 0.01	DNA-repair; error-free or error-prone translesion synthesis	DNA-directed DNA polymerase	deoxycytidyl transferase activity and role in error-free translesion synthesis, error-prone translesion synthesis
1	DNA replication	CAGL0E01177g	CPR1	1	0.5	1.65354	1.92711	0.12	Protein folding; switch from mitotic to meiotic division	(wiki) peptidyl prolyl isomerase activity, which catalyzes the isomerization of peptide bonds from trans form to cis form at proline residues and facilitates protein folding	(S. cerevisiae) protein level increases upon DNA replication stress; (C. albicans) macrophage induced;
2	ER	CAGL0K00715g	RTA1	2	0.5	1.62742	1.03074	0.0440527	Resistance To 7-Aminocholesterol	Response to ER stress; resistance to azole	(C. albicans) Flippase involved in sphingolipid long chain base release; mediates calcineurin-dependent ER stress response and resistance to azoles;
2	general	CAGL0M13189g	MSN4	1	0.5	3.78245	3.56466	< 0.01	TF	response to multiple stress
2	heat	CAGL0L08932g	LSP1	1	1	1.42181	0.994314	0.142417	eisosome core component,	endocytosis, response to heat	response to heat
3	hypoxia	CAGL0E05566g	(TYE7)	2	1	2.03736	2.28132	< 0.01	(S. cerevisiae) bHLH DNA binding domain, binds to E-box motifs in glycolitic genes promoters, and contribute to their activation.	positive regulation of glycolytic genes
1	osmotic	CAGL0D01276g	(OPY2)	2	1	1.63928	1.9904	0.08	integral membrane protein	cell wall; response to oxidative stress; positive regulation of filamentous growth	(S. cerevisiae) involved in the signaling branch of the high-osmolarity glycerol (HOG) pathway and as a regulator of the filamentous growth pathway;
2	osmotic	CAGL0M12430g	RHR2	1	1	1.50395	1.39374	0.11	Glycerol-3-Phosphate Phosphatase	Glycerol biosynthesis,	{S. cerevisiae} involved in glycerol biosynthesis, induced in response to both anaerobic and osmotic stress; {C. albicans} roles in osmotic tolerance, glycerol accumulation in response to salt; regulated by stress, macrophage, yeast hyphal switch
-1	osmotic, dessication	CAGL0E05984g	(GRE1)	1	0	45.2548	8	< 0.01	Hydrophilin	Response to stress (dessication)	(S. cerevisiae) essential in desiccation-rehydration process; stress induced (osmotic, ionic, oxidative, heat shock and heavy metals); regulated by the HOG pathway;
3	osmotic, salt	CAGL0M11660g	{GPP1}	2	1	29.8055	22.6284	< 0.01	hydrolase	Glycerol biosynthesis; osmotic tolerance, response to salt, macrophage	{S. cerevisiae} involved in glycerol biosynthesis, induced in response to both anaerobic and osmotic stress; {C. albicans} roles in osmotic tolerance, glycerol accumulation in response to salt; regulated by stress, macrophage, yeast hyphal switch
-1	oxidative	CAGL0C04741g	SOD1	2	0.5	1.48036	2.55833	0.13	Cytosolic copper-zinc superoxide dismutase	detoxifies superoxide	(S. cerevisiae) mutants have defects in cell wall synthesis(C. albicans) role in protection from oxidative stress; required for full virulence
3	oxidative	CAGL0G01540g	NCE103	2	1	9.34155	5.15066	< 0.01	Beta carbonic anhydrase	Response to oxidative stress and CO2	(C. albicans) converts of CO2 to bicarbonate; essential for virulence in host niches with limited CO2, normal white-opaque switch;
3	oxidative	CAGL0K10604g	(CMK2)	1	1	2.35507	1.74167	< 0.01	calmodulin-dependent protein kinase activity	response to oxidative stress	role in cellular response to oxidative stress, fungal-type cell wall organization
2	oxidative, osmotic	CAGL0M10829g	SSK2	1	1	1.66501	1.47569	0.035252	MAPKKK of HOG1 pathway, mediates actin cytoskeleton recovery from osmotic stress	Response to oxidative/hyperosmotic stress	Response to oxidative and hyperosmotic stress
3	oxidative, osmotic, heat	CAGL0J04202g	HSP12	1	1	13.1608	1.81753	< 0.01	heat shock protein, lipid binding	Cell adhesion, response to stress (heat, osmotic, oxidative)	heat shock protein, up-regulated in azole resistant strain, response to stress (heat, osmotic, oxidative)
2	starvation, biotic	CAGL0E04884g	(ADR1)	1	0.5	2.33423	2.49289	0.0213172	C2H2 TF	Positive regulation of ethanol catabolic process, fatty-acid beta-oxidation, peroxisome organization, response to oleic acid and response to ethanol	(S. cerevisiae) required for transcription of glucose-repressed genes and genes required for ethanol, glycerol and fatty acid utilization; (C. albicans) mutant phenotype suggests a different set of targets from those in Scer
3	starvation, DNA replication	CAGL0L06644g	(RTT107)	2	1	2.54237	2.17855	< 0.01	implicated in DNA repair	Response to DNA replication stress and starvation	(C. albicans) cellular response to starvation / biotic stress
3	starvation, hypoxia	CAGL0M07634g	(EFG1)*	1	1	1.90075	0.92711	0.0970436	Putative bHLH TF; role in adhesion, virulence	Response to stress; cell adhesion, virulence	(S. cerevisiae) relocalizes to the cytosol in response to hypoxia
2	starvation, oxidative, heat	CAGL0D06512g	(CDC25)	1	1	2.24459	3.06398	0.0200092	Putative membrane bound guanine nucleotide exchange factor	Response to stress and starvation	gene is upregulated in azole-resistant strain; (Satomura et al 2016 Sci Rep) Cdc25p → Ras1p/Ras2p → cAMP levels (?direction), which adjusts the balance between growth and stress tolerance
2	starvation, oxidative, osmotic	CAGL0F00649g	(RCK2)	1	1	2.06253	3.94644	0.109481	Protein kinase	Response to stress (osmotic) and starvation	(C. albicans) Predicted MAP kinase-activated protein kinase, similar to S. cerevisiae serine/threonine protein kinase Rck2p; induced by osmotic stress via Hog1p; macrophage/pseudohyphal-repressed; mutants are sensitive to rapamycin; mutant has cell wall defects
2	starvation, salt, osmotic	CAGL0K12034g	ENA1	2	1	1.62386	0.940832	0.121279	Cation exporter, ATPase activity	Response to stress (salt, osmotic pressure) and to glucose starvation	highly upregulated by increased osmotic pressure or sodium concentration, plays a role in sodium detoxification
2	stationary phase	CAGL0K10164g	(SPI1)	1	0.5	17.3376	15.0464	< 0.01	Predicted GPI-linked protein; cell wall-related; putative adhesin-like protein	cell wall related, weak acid resistance	(S. cerevisiae) Stationary Phase Induced; GPI-anchored cell wall protein involved in weak acid resistance; basal expression requires Msn2p/Msn4p; expression is induced under conditions of stress and during the diauxic shift
1	temperature shock	CAGL0L07502g	(TIP1)	1	1	1.36341	2.18051	0.195	putative GPI-linked cell wall protein	Fungal type cell wall	(S. cerevisiae) Major cell wall mannoprotein with possible lipase activity
2	undefined	CAGL0D05434g	{ROX1}	1	1	1.92089	2.40459	0.010579	Putative TF	Regulation of txn from RNA PolII promoters in response to stress	role in regulating exn from RNA PolII promoter, in response to stress. Best hit in Scer is Regulation by OXygen (ROX1), which is involved in the hyperosmotic stress resistance. But the best hit in C. albicans is not regulated by oxygen or serum, suggesting divergent function
1	undefined	CAGL0M06325g	(RLM1)	2	1	2.49976	3.34142	< 0.01	putative TF	Regulation of transcription from RNA PolII promoters in response to stress	(S. cerevisiae) MADS-box transcription factor; component of the protein kinase C-mediated MAP kinase pathway involved in the maintenance of cell integrity

## Sheet: Table S2
Table S2 Response to chemical
Quality	Chemical(s)	ORF	Gene Name	Motif	ChIP	Fold w/ Pho2	Fold w/o Pho2	P-value	Function	Process	Other annotation
3	carbon dioxide	CAGL0G01540g	NCE103	2	1	9.34155	5.15066	< 0.01	Beta carbonic anhydrase	Response to oxidative stress and CO2	(C. albicans) converts of CO2 to bicarbonate; essential for virulence in host niches with limited CO2, normal white-opaque switch;
2	drug	CAGL0A00517g	(PMC1)	1	0.5	1.53769	1.19122	0.0722	calcium homeostasis	Vacuolar calcium P-type ATPase;	(C. albicans) transcript regulated by calcineurin and fluconazole; mutant shows increased resistance to fluconazole, lithium; increased sensitivity to calcium; Spider biofilm induced (6, 7)
3	drug	CAGL0J07040g	(GDE1)	2	1	2.88	1.17675	0.02	Phosphodiesterase; product serves as a phosphate source	glycerol metabolism; glycerophospholipid catabolism	have glycerophosphocholine phosphodiesterase activity, role in cellular response to drug, glycerophospholipid catabolic process and cytosol, ribosome localization
1	drug	CAGL0K00693g	(SWE1)	2	0.5	1.34362	1.2145	0.147	Protein kinase that regulates G2/M transition	Cell cycle	(S. cerevisiae) Protein kinase that regulates the G2/M transition; negative regulator of the Cdc28p kinase; morphogenesis checkpoint kinase; positive regulator of sphingolipid biosynthesis via Orm2p; phosphorylates a tyrosine residue in the N-terminus of Hsp90 in a cell-cycle associated manner, thus modulating the ability of Hsp90 to chaperone a selected clientele;
1	drug	CAGL0M06325g	(RLM1)	2	1	2.49976	3.34142	< 0.01	putative TF	Regulation of transcription from RNA PolII promoters in response to stress	(S. cerevisiae) MADS-box transcription factor; component of the protein kinase C-mediated MAP kinase pathway involved in the maintenance of cell integrity
1	drug	CAGL0A01628g	MIG1	2	1	1.91802	2.0093	0.0171014	Transcription repressor, glucose repression	negative regulation of transcription by glucose, positive regulation of filamentous growth in response to starvation	(S. cerevisiae) Transcription factor involved in glucose repression; containing two Cys2His2 zinc finger motifs; regulates filamentous growth along with Mig2p in response to glucose depletion [Karunanithi & Cullen 2012]
2	drug, high salt	CAGL0M08552g	(PMP3)	1	1	1.3668	1.2158	0.2	regulate membrane potential	Regulate membrane potential; response to high salt or low temperature	response to high salt or low temperature
3	drug, N-acetyl-D-glucosamine	CAGL0M07634g	(EFG1)*	1	1	1.90075	0.92711	0.0970436	Putative bHLH TF; role in adhesion, virulence	Response to stress; cell adhesion, virulence	(S. cerevisiae) relocalizes to the cytosol in response to hypoxia
2	nutrient	CAGL0D06512g	(CDC25)	1	1	2.24459	3.06398	0.0200092	Putative membrane bound guanine nucleotide exchange factor	Response to oxidative, heat stress and starvation	gene is upregulated in azole-resistant strain; (Satomura et al 2016 Sci Rep) Cdc25p → Ras1p/Ras2p → cAMP levels (?direction), which adjusts the balance between growth and stress tolerance
2	oleic acid	CAGL0E04884g	(ADR1)	1	0.5	2.33423	2.49289	0.0213172	C2H2 TF	Positive regulation of ethanol catabolic process, fatty-acid beta-oxidation, peroxisome organization, response to oleic acid and response to ethanol	(S. cerevisiae) required for transcription of glucose-repressed genes and genes required for ethanol, glycerol and fatty acid utilization; (C. albicans) mutant phenotype suggests a different set of targets from those in Scer
3	oxidative agent	CAGL0J04202g	HSP12	1	1	13.1608	1.81753	< 0.01	heat shock protein, lipid binding	Cell adhesion, response to stress (heat, osmotic, oxidative)	heat shock protein, up-regulated in azole resistant strain, response to stress (heat, osmotic, oxidative)
3	oxidative agent	CAGL0K10604g	(CMK2)	1	1	2.35507	1.74167	< 0.01	calmodulin-dependent protein kinase activity	response to oxidative stress	role in cellular response to oxidative stress, fungal-type cell wall organization
-1	oxidative agent	CAGL0C04741g	SOD1	2	0.5	1.48036	2.55833	0.13	Cytosolic copper-zinc superoxide dismutase	detoxifies superoxide	(S. cerevisiae) mutants have defects in cell wall synthesis(C. albicans) role in protection from oxidative stress; required for full virulence
2	oxidative agent, methylmercury	CAGL0M13189g	MSN4	1	0.5	3.78245	3.56466	< 0.01	TF	response to multiple stress
2	pheromone	CAGL0D01276g	(OPY2)	2	1	1.63928	1.9904	0.08	integral membrane protein	response to osmotic stress	mitotic cell cycle arrest in respone to pheromone
2	pheromone	CAGL0L06424g	(CCW12)	2	1	0.809215	1.91522	0.603	structural constituent of cell wall	Cell wall	{C. albicans} best hit in Calb encodes a GPI-anchored adhesin-like protein
3	pheromone	CAGL0K07458g	(YPK1)	1	1	2.12579	1.33992	< 0.01	Serine/Threonine/Tyrosine kinase	cellular protein modification	(S. cerevisiae) null mutant shows sensitivity to heat and ionic stress
2	sodium arsenate	CAGL0M10829g	SSK2	1	1	1.66501	1.47569	0.035252	MAPKKK of HOG1 pathway, mediates actin cytoskeleton recovery from osmotic stress	Response to oxidative/hyperosmotic stress	Response to oxidative and hyperosmotic stress
3	undefined	CAGL0E05566g	(TYE7)	2	1	2.03736	2.28132	< 0.01	(S. cerevisiae) bHLH DNA binding domain, binds to E-box motifs in glycolitic genes promoters, and contribute to their activation.	positive regulation of glycolytic genes
2	undefined	CAGL0F00649g	(RCK2)	1	1	2.06253	3.94644	0.109481	Protein kinase	Response to stress (osmotic) and starvation	(C. albicans) Predicted MAP kinase-activated protein kinase, similar to S. cerevisiae serine/threonine protein kinase Rck2p; induced by osmotic stress via Hog1p; macrophage/pseudohyphal-repressed; mutants are sensitive to rapamycin; mutant has cell wall defects
-1	water deprivation	CAGL0E05984g	(GRE1)	1	0	45.2548	8	< 0.01	Hydrophilin	Response to stress (dessication)	(S. cerevisiae) essential in desiccation-rehydration process; stress induced (osmotic, ionic, oxidative, heat shock and heavy metals); regulated by the HOG pathway;

## Sheet: Table S3
Table S3 Cell wall and adhesion
Quality	Stressor(s)	ORF	Gene Name	Motif	ChIP	Fold w/ Pho2	Fold w/o Pho2	P-value	Function	Process	Other annotation
3	Cell adhesion	CAGL0J04202g	HSP12	1	1	13.1608	1.81753	< 0.01	heat shock protein, lipid binding	cell adhesion
3	Cell adhesion	CAGL0M07634g	(EFG1)*	1	1	1.90075	0.92711	0.0970436	Putative bHLH TF; role in adhesion, virulence	Response to stress; cell adhesion, virulence	(S. cerevisiae) relocalizes to the cytosol in response to hypoxia
2	Cell adhesion	CAGL0M12430g	RHR2	1	1	1.50395	1.39374	0.11	Putative DL-glycerol Phosphatase	Glycerol biosynthesis,	(S. cerevisiae) GPP1 involved in glycerol biosynthesis, induced in response to both anaerobic and osmotic stress; (C. albicans) roles in osmotic tolerance, glycerol accumulation in response to salt; regulated by stress, macrophage, yeast hyphal switch, cell-abiotic substrate adhesion
2	Cell wall	CAGL0E05940g	(pkd2)	1	1	1.43152	1.35493	0.0901	calcium channel activity	cell wall organization	cell wall repair
2	Cell wall	CAGL0K10164g	(SPI1)	1	0.5	17.3376	15.0464	< 0.01	Predicted GPI-linked protein; putative adhesin-like protein	cell wall related, weak acid resistance	(S. cerevisiae) Stationary Phase Induced; GPI-anchored cell wall protein involved in weak acid resistance; basal expression requires Msn2p/Msn4p; expression is induced under conditions of stress and during the diauxic shift
2	Cell wall	CAGL0L06424g	(CCW12)	2	1	0.809215	1.91522	0.603	structural constituent of cell wall	Cell wall	{C. albicans} best hit in Calb encodes a GPI-anchored adhesin-like protein
1	Cell wall	CAGL0L07502g	(TIP1)	1	1	1.36341	2.18051	0.195	putative GPI-linked cell wall protein	Cell wall	(S. cerevisiae) Major cell wall mannoprotein with possible lipase activity; transcription is induced by heat- and cold-shock;
1	Cell wall	CAGL0M08514g	PIR5	2	1	1.21334	1.77358	0.556	Putative cell wall component	Cell wall	(S. cerevisiae) O-glycosylated covalently-bound cell wall protein; (C. albicans) exn is macrophage induced; deletion leads to increased chitin content, increased virulence and resistance to stresses – conterintuitive
2	Cell wall	CAGL0J06050g	(SPS100)	1	1	1.55873	2.40868	0.133519	Cell wall-related secretory glycoprotein;	stationary phase	{S. cerevisiae} induced by nutrient deprivation-associated growth arrest and upon entry into stationary phase; may be involved in adaptation prior to stationary phase entry;
2	Cell wall	CAGL0F00649g	(RCK2)	1	1	2.06253	3.94644	0.109481	Protein kinase	Response to stress (osmotic) and starvation	(C. albicans) Predicted MAP kinase-activated protein kinase, similar to S. cerevisiae serine/threonine protein kinase Rck2p; induced by osmotic stress via Hog1p; macrophage/pseudohyphal-repressed; mutants are sensitive to rapamycin; mutant has cell wall defects
1	Cell wall	CAGL0M06325g	(RLM1)	2	1	2.49976	3.34142	< 0.01	putative TF	Regulation of transcription from RNA PolII promoters in response to stress	(S. cerevisiae) MADS-box transcription factor; component of the protein kinase C-mediated MAP kinase pathway involved in the maintenance of cell integrity
-1	Cell wall	CAGL0C04741g	SOD1	2	0.5	1.48036	2.55833	0.13	Cytosolic copper-zinc superoxide dismutase	detoxifies superoxide	(S. cerevisiae) mutants have defects in cell wall synthesis(C. albicans) role in protection from oxidative stress; required for full virulence
3	Cell adhesion ?	CAGL0B02926g	BMT3	1	1	> 100	81.6005	< 0.01	β-mannosyltransferase	Fungal cell wall biosynthesis	{C. albicans} cellular response to starvation / biotic stress
3	Cell adhesion ?	CAGL0B02970g	BMT5	1	1	2.7911	3.1628	< 0.01	β-mannosyltransferase	Fungal cell wall biosynthesis	Jawhara S, et al. (2012) “The C. albicans cell wall expresses β-1,2-linked mannosides (β-Mans), promoting its adherence to host cells and tissues.”, results in C. glabrata find that bmt2-6 quintuple mutant has reduced virulence and is less able to colonize host
3	Cell wall ?	CAGL0I00726g	(OSW5)	2	1	2.88899	4.32019	0.023	uncharacterized	unknown	osw5 null mutant spores exhibit increased spore wall permeability and sensitivity to beta-glucanase digestion

## Sheet: Table S4
Table S4 Carbon metabolism
Quality	ORF	Gene Name	Motif	ChIP	Fold w/ Pho2	Fold w/o Pho2	P-value	Function	Process	Other annotation
Carbohydrate Metabolism
1	CAGL0C01397g	(PFK26)	2	1	3.64746	1.32456	< 0.01	6-phosphofructo-2-kinase, fructose metabolism	fructose metabolism	(S. cerevisiae) transcriptional regulation involves PKA
1	CAGL0F00605g	GLK1	0	0.5	5.86632	1.94785	< 0.01	Aldohexose specific glucokinase, glucose transport, glycolysis and mannose metabolism
1	CAGL0H00682g	(YMR196W)	1	1	2.12755	1.06925	< 0.01	predicted mannosyl-oligosaccharide glucosidase activity	oligosaccharide metabolism	role in oligosaccharide metabolic process
3	CAGL0I00748g	(NDE1)	2	1	1.9993	2.25942	0.0166441	Mitochondrial NADH dehydrogenase	NADH oxidation, glycolytic fermentation to ethanol	(S. cerevisiae) Nde1p and Nde2p provide cytosolic NADH to the mitochondrial respiratory chain
3	CAGL0J07040g	(GDE1)	2	1	2.88	1.17675	0.02	Phosphodiesterase; product serves as a phosphate source	glycerol metabolism; glycerophospholipid catabolism	have glycerophosphocholine phosphodiesterase activity, role in cellular response to drug, glycerophospholipid catabolic process and cytosol, ribosome localization
1	CAGL0K07480g	PGM1	2	1	1.73364	1.11799	0.043856	Putative phosphoglucomutase, interconverts G1P and G6P	Galactose catabolism; glycogen/trehalose biosynthesis	(S. cerevisiae) catalyzes the conversion from glucose-1-phosphate to glucose-6-phosphate, which is a key step in hexose metabolism; functions as the acceptor for a Glc-phosphotransferase; protein abundance increases in response to DNA replication stress
2	CAGL0M12430g	RHR2	1	1	1.50395	1.39374	0.11	DL-glycerol-3-phosphate phosphatase; also known as glycerol-1-phosphatase; GPP1 has a paralog, GPP2, that arose from the whole genome duplication	Glycerol biosynthesis,	(S. cerevisiae) involved in glycerol biosynthesis, induced in response to both anaerobic and osmotic stress; (C. albicans) roles in osmotic tolerance, glycerol accumulation in response to salt; regulated by stress, macrophage, yeast hyphal switch, cell-abiotic substrate adhesion
Regulation of Carbohydrate Metabolism
3	CAGL0E05566g	(TYE7)	2	1	2.03736	2.28132	< 0.01	(S. cerevisiae) bHLH DNA binding domain, binds to E-box motifs in glycolitic genes promoters, and contribute to their activation.	positive regulation of glycolytic genes					2	1	2.03736	2.28132	< 0.01	(S. cerevisiae) bHLH DNA binding domain, binds to E-box motifs in glycolitic genes promoters, and contribute to their activation.	positive regulation of glycolytic genes
1	CAGL0A01628g	MIG1	2	1	1.91802	2.0093	0.0171014	Transcription repressor, glucose repression	negative regulation of transcription by glucose, positive regulation of filamentous growth in response to starvation	(S. cerevisiae) Transcription factor involved in glucose repression; containing two Cys2His2 zinc finger motifs; regulates filamentous growth along with Mig2p in response to glucose depletion [Karunanithi & Cullen 2012]

## Sheet: Table S5
Table S5 All other functional categories
Quality	Fun_group	ORF	Gene Name	Motif	ChIP	Fold w/ Pho2	Fold w/o Pho2	P-value	Function	Process	Other annotation
1	Biosynthesis of arginine	CAGL0I10791g	(ARG3)	2	1	2.64238	6.85513	< 0.01	Ornithine carbamoyltransferase	Arginine biosynthesis
1	Biosynthesis of histidine	CAGL0L00759g	HIS1	2	1	1.79648	1.22152	0.0295	enzyme of histidine biosynthesis	Histidine biosynthesis	ATP phosphoribosyltransferase, the gene product is an enzyme that catalyses the first step in the biosynthesis of histidine
1	Cell budding	CAGL0C01881g	{BOI1}	2	1	1.28513	1.19598	0.244	phospholipid binding	Budding	{S. cerevisiae} Protein implicated in polar growth; functionally redundant with Boi2p; interacts with bud-emergence protein Bem1p; contains an SH3 (src homology 3) domain and a PH (pleckstrin homology) domain; relocalizes from bud neck to cytoplasm upon DNA replication stress;
1	Cell cycle, Organelle organization, DNA metabolsim	CAGL0A01606g	(HOP2)	2	1	4.60392	2.50334	< 0.01	double stranded DNA binding, chromosome condensing	meiotic recombination	Meiosis-specific protein that localizes to chromosomes; prevents synapsis between nonhomologous chromosomes and ensures synapsis between homologs; complexes with Mnd1p to promote homolog pairing and meiotic double-strand break repair; heterodimer of Hop2p-Mnd1p stimulates the Dmc1p-meidated strand invasion
3	Cellular protein modification	CAGL0M02871g	(MNN5)	1	1	2.71443	1.82518	< 0.01	Alpha-1,2-mannosyltransferase	protein glycosylation	{C. albicans} Alpha-1,2-mannosyltransferase; similar to S. cerevisiae Mnn2; role in cell wall integrity, temperature sensitivity; iron utilization in low iron; Tn mutation affects filamentous growth; filament induced; increased chitin exposes beta-glucan
2	Cellular protein modification	CAGL0K04301g	(FMP48)	1	1	5.5889	4.85181	< 0.01	Protein Kinase; Mitochondrial associated	unknown	(C. albicans) required for full virulence and kidney colonization in mouse systemic infection
2	Fructose 6-phosphate metabolism	CAGL0I05698g	(PFK2)	1	1	1.56039	0.922316	0.0735581	PhosphoFructoKinase	glycolysis	(C. albicans) AMP activated; ATP inhibited; phagocytosis, hyphal repressed; fluconazole-induced; stationary-phase enriched; flow model biofilm induced
3	Metabolism of lipid	CAGL0H01177g	(DPP1)	2	1	2.52846	1.90666	< 0.01	phosphatase	phospholipid metabolism; farnesol biosynthesis	phospholipid phosphatase activity; diacylglycerol diphosphate phosphatase
1	Metabolism of lipid	CAGL0C04939g	(LIH1)	1	0.5	7.03939	1.42449	< 0.01	triglyceride lipase	lipid metabolism	uncharacterized
2	Metabolism of RNA	CAGL0H08778g	(PUF2)	2	1	2.57736	2.25316	< 0.01	mRNA binding	mRNA catabolism	(S. cerevisiae) nuclear-transcribed mRNA catabolic process, deadenylation-dependent decay
2	Regulation of biological process	CAGL0I00902g	{GAT2}	2	1	1.81379	2.28774	0.0145	putative TF	unknown	uncharacterized
1	Regulation of biological process	CAGL0D04378g	(KCS1)	1	0	2.35795	1.13281	< 0.01	IP6/7 Kinase	inositol phosphate biosynthesis	(S. cerevisiae) required for processes such as vacuolar biogenesis, stress response, RNA polymerase I-mediated rRNA transcription and telomere maintenance
2	TCA cycle, Succinyl-CoA metabolism	CAGL0F08107g	LSC2	1	1	1.61605	1.28359	0.0682684	Beta subunit of succinyl-CoA ligase; TCA cycle (generate energy from pyruvate derived from glycolysis)	Succinyl CoA metabolic processes; TCA cycle (generate energy from pyruvate derived from glycolysis)	(C. albicans) induced in high iron; protein present in exponential and stationary growth phase yeast cells
3	Transport	CAGL0J08294g	(BOR1)	1	1	2.60291	1.11323	< 0.01	Boron exporter	Boron tolerance	borate transport
3	Transport, Cellular protein modification	CAGL0B02453g	(GTR1)	2	1	2.93054	2.34329	< 0.01	TOC1-stimulating GTPase, phosphate ion transport	Positive regulation of TORC1; Phosphate ion transport	(S. cerevisiae) involved in phosphate transport and telomeric chromatin silencing; Subunit of a TORC1-stimulating GTPase complex; subunit of the heterodimeric Gtr1-Gtr2 GTPase complex that stimulates TORC1 in response to amino acid stimulation; (C. albicans) transcript is upregulated in clinical isolates from HIV+ patients with oral candidiasis;
2	Transport, Cellular protein modification	CAGL0H09152g	(PTK1)	1	1	1.30393	1.56841	0.294	Putative serine/threonine protein kinase	polyamine transport, spermine uptake
2	Transport, Organelle organization	CAGL0H00704g	(ICY2)	1	1	2.70951	1.08136	0.0176133	unknown	autophagosome assembly	(S. cerevisiae) a paralog, ICY1, is induced upon amino acid starvation
2	Transport, Regulation of biological processes	CAGL0E06292g	{YHR022C}	2	1	66.7301	44.1567	< 0.01	unknown	GTP binding; GTPase	{C. parapsilosis} best hit in this species has homologs in S. pombe, and is implicated to have a functional role in response to stress
3	Unknown	CAGL0A01650g	(ECL1)	1	1	5.14184	3.50282	< 0.01	uncharacterized, signal transduction	unknown	Putative protein; gene is upregulated in azole-resistant strain
3	Unknown	CAGL0M01870g	{CMR3}	2	1	2.18678	2.35468	0.0161	Putative zinc finger protein	unknown	uncharacterized
3	Unknown	CAGL0G06050g		2	1	> 100	> 100	<0.01	unknown	unknown	Short protein (~70aa) with no homologs in other fungi. with only slight sequence similarity with cingulin protein in a fish species
2	Unknown	CAGL0E04548g	(YOR020W-A)	1	0.5	1.93584	1.61212	0.0786	uncharacterized	mitochondrial function	(S. cerevisiae) the authentic, non-tagged protein is detected in highly purified mitochondria in high-throughput studies
2	Unknown	CAGL0E04554g		1	0.5	2.72624	12.4035	0.0123	uncharacterized	unknown	Up-regulated in azole-resistant strain
2	Unknown	CAGL0K05390g		1	1	2.5416	1.66859	< 0.01	novel protein-coding	unknown	unknown function
2	Unknown	CAGL0E01837g	YPS9	1	1	1.81518	1.67603	< 0.01	putative GPI-anchor and aspartic protease	Predicted Aspartic protease; Predicted GPI-anchor	required for virulence in mice, expression induced at high T
2	Unknown	CAGL0M12474g	(YIL055C)	1	1	3.83299	1.38863	<0.01	unknown	unknown
1	Unknown	CAGL0G04829g	{PSP2}	1	1	3.47677	1.43195	< 0.01	mRNA binding	unknown
