# Supplementary figures and images for: Evolution of reduced co-activator dependence led to target expansion of a starvation response pathway
Source: eLife journal article supplement (doi:10.7554/elife.25157), 2017-05-09

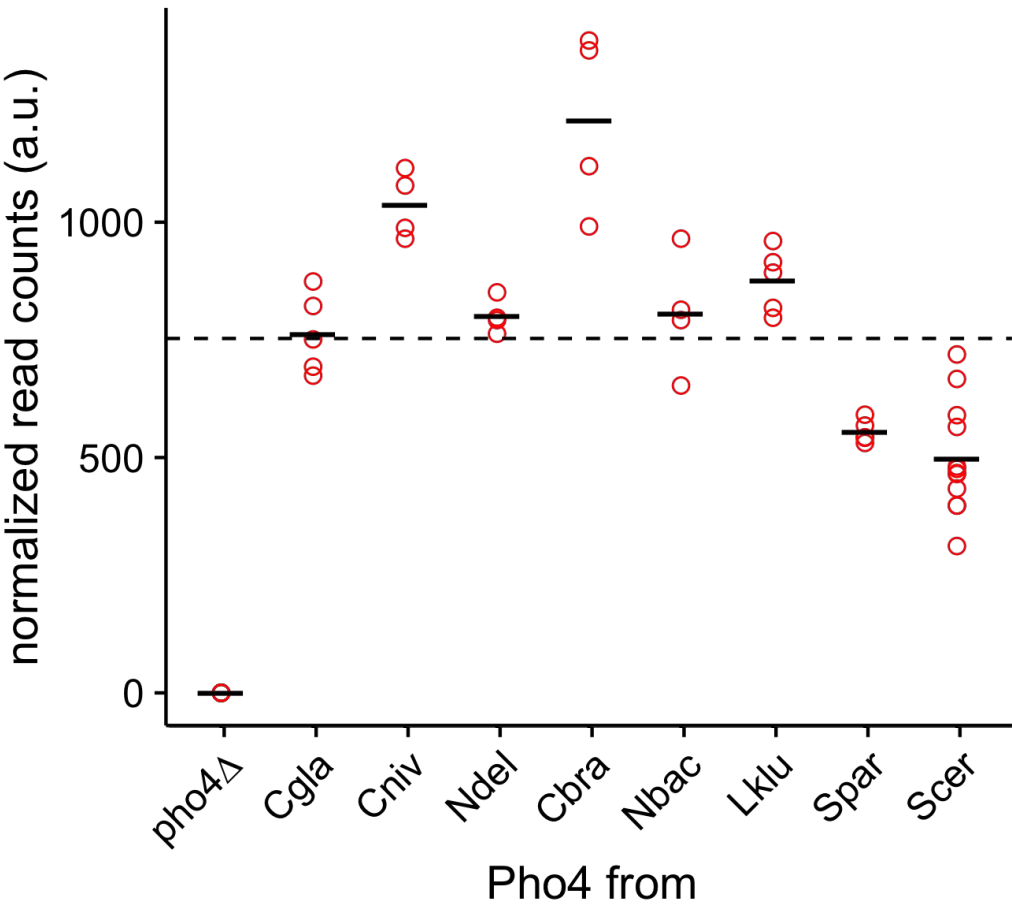

Supplement: supp [file elife-25157-supp-v1.zip]

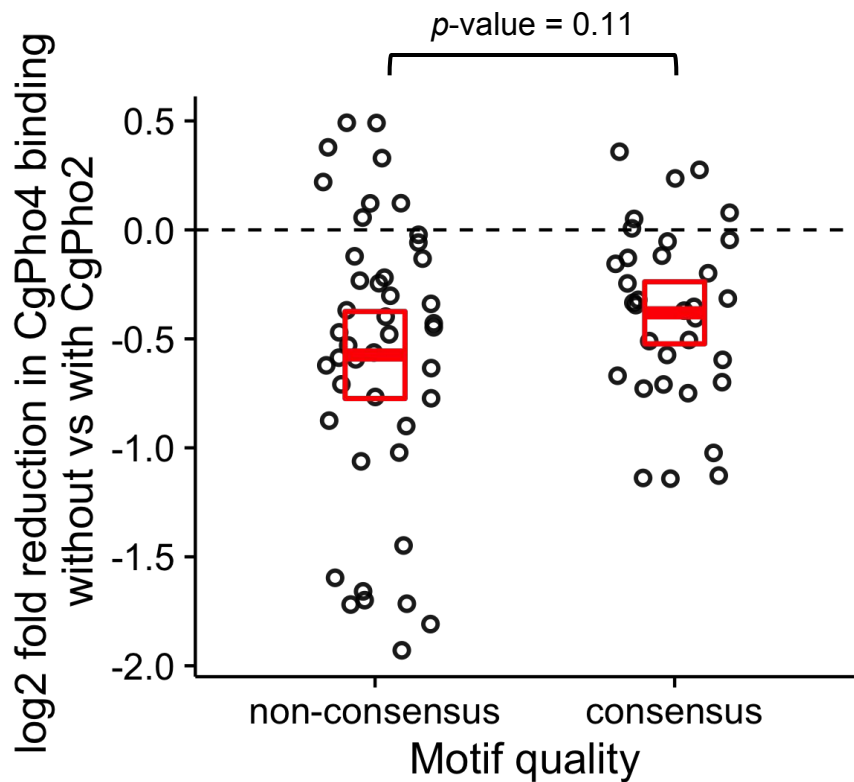

Supplement: supp [file elife-25157-supp-v1.zip]

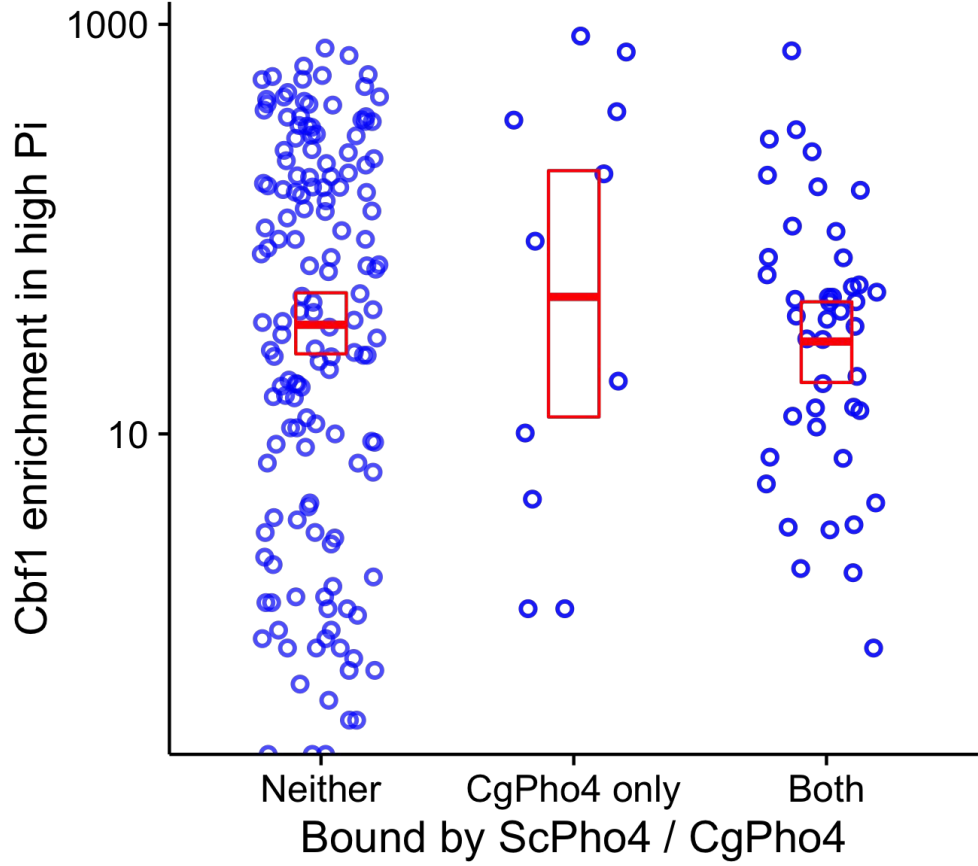

Supplement: supp [file elife-25157-supp-v1.zip]

He, Zhou, O'Shea - Figure 3- figure supplement 2

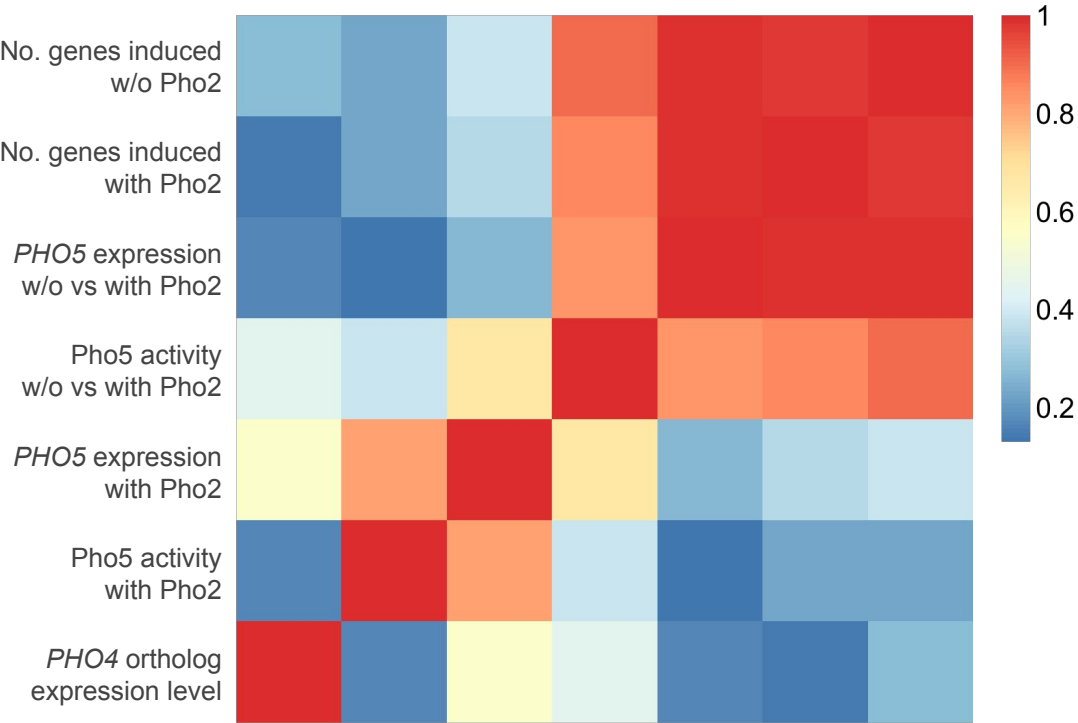

Supplement: supp [file elife-25157-supp-v1.zip]
